# Supplementary material for: Comparative effects of angiotensin-converting enzyme inhibitors and angiotensin II receptor blockers on pulmonary function in hypertensive patients
Source: publisher site journal article supplement (doi:10.1515/jbcpp-2020-0243), 2021-03-13
Supplement: Supplementary file 1 [file j_jbcpp-2020-0243_suppl.docx]

Supplementary Table 1: Blood pressure measurements before and after treatment in setting and standing positionsen.

| <!--Col Count:9--> | Before treatment | | | | 2 h after treatment | | | |
| --- | --- | --- | --- | --- | --- | --- | --- | --- |
| Setting position | | Standing position | | Setting position | | Standing position | |
| Systolic pressure | Diastolic pressure | Systolic pressure | Diastolic pressure | Systolic pressure | Diastolic pressure | Systolic pressure | Diastolic pressure |
| Control | 120.2 ± 2.5 | 80.6 ± 1.1 | 117.8 ± 2.8 | 78.8 ± 1.2 | 120.4 ± 1.5 | 80.2 ± 0.7 | 118.1 ± 2.4 | 78.2 ± 1.6 |
| Lisinopril | 154.2 ± 9.9 | 92.7 ± 5.8 | 150.7 ± 9.9٭ | 90 ± 5.4 | 130.8 ± 1.9 | 81.4 ± 4.7 | 124 ± 6.9 | 79 ± 2.1 |
| Captopril | 157.6 ± 12.4٭ | 97.5 ± 11.6 | 151.2 ± 13.4 | 92.7 ± 12.3٭ | 128.5 ± 7.4 | 82.4 ± 9.1 | 124.7 ± 7.9 | 80.1 ± 4.4 |
| Enalapril | 163.8 ± 10.2٭ | 99.2 ± 10.6 | 158.5 ± 9.6 | 92.2 ± 8.5٭ | 133 ± 8.2٭ | 83 ± 3.3 | 129 ± 8.7٭ | 76.4 ± 7.1 |
| Valsartan | 154.1 ± 9.5 | 87.2 ± 7.1٭ | 147.5 ± 8.1 | 82.7 ± 8.4 | 128.14 ± 7.7 | 79.2 ± 4.1 | 123.1 ± 7.6 | 77.1 ± 4.8 |
| Losartan | 156.5 ± 13.3٭ | 90.3 ± 11.7٭ | 152.1 ± 13.4 | 87 ± 8.6 | 127.6 ± 7.9 | 78.6 ± 3.8 | 122.8 ± 4.4 | 77.5 ± 3.3 |

*p is considered statistically significant at level<0.05.en
